# Supplementary material for: Genetic Profiling of the Full-Length tprK Gene in Patients with Primary and Secondary Syphilis
Source: PubMed Central journal article supplement (PMC10269439; doi:10.1128/spectrum.04931-22), 2023-04-10
Supplement: spectrum.04931-22-s0001.pdf [file spectrum.04931-22-s0001.pdf]

## **SUPPLEMENTAL MATERIAL**

**TABLE S1. PacBio barcoded *tprK* primers used in this study**

**TABLE S2. The long-read sequencing data of the *tprK* gene in the 28 clinical syphilis samples**

**TABLE S3. The obtained full-length *tprK* sequences in the study. (A) from primary syphilis samples (B) from secondary syphilis samples**

Table S1. PacBio barcoded *tprK* primers used in this study

| Primer Name            | Sequence (5' -> 3')                           |
|------------------------|-----------------------------------------------|
| <i>tprK</i> -F_bc X-1  | <b>TAGTGTGCGACTCTGAACCGGGCATGAATTTTCTTT</b>   |
| <i>tprK</i> -F_bc X-2  | <b>TCGTCATACGCTCTAGACCGGGCATGAATTTTCTTT</b>   |
| <i>tprK</i> -F_bc X-3  | <b>GCGCGCGCACTCTCTGACCGGGCATGAATTTTCTTT</b>   |
| <i>tprK</i> -F_bc X-4  | <b>TGTGCTCTTACACAGACCGGGCATGAATTTTCTTT</b>    |
| <i>tprK</i> -F_bc X-5  | <b>TATACGAGATACGTGAACCGGGCATGAATTTTCTTT</b>   |
| <i>tprK</i> -F_bc X-6  | <b>GCTCGACTGTGAGAGAACCGGGCATGAATTTTCTTT</b>   |
| <i>tprK</i> -F_bc X-7  | <b>CGCTAGAGATCTGCTAACCGGGCATGAATTTTCTTT</b>   |
| <i>tprK</i> -F_bc X-8  | <b>TGTACGCTCTCTATATAACCGGGCATGAATTTTCTTT</b>  |
| <i>tprK</i> -F_bc X-9  | <b>AGCACGTGTGTCGACAACCGGGCATGAATTTTCTTT</b>   |
| <i>tprK</i> -F_bc X-10 | <b>TCTCACTGATAGCGTGACCGGGCATGAATTTTCTTT</b>   |
| <i>tprK</i> -F_bc X-11 | <b>TAGCGTGAGAGTGTGACCGGGCATGAATTTTCTTT</b>    |
| <i>tprK</i> -F_bc X-12 | <b>ACACGTGTGCTCTCTCACCGGGCATGAATTTTCTTT</b>   |
| <i>tprK</i> -F_bc X-13 | <b>TCTATGAGCACTCTCGACCGGGCATGAATTTTCTTT</b>   |
| <i>tprK</i> -F_bc X-14 | <b>TCTCACGAGAGCGCACACCGGGCATGAATTTTCTTT</b>   |
| <i>tprK</i> -R_bc X-1  | <b>TCAGAGTCGCACACTACCATACATCCCTACCAAATCA</b>  |
| <i>tprK</i> -R_bc X-2  | <b>CTAGAGCGTATGACGACCATACATCCCTACCAAATCA</b>  |
| <i>tprK</i> -R_bc X-3  | <b>CAGAGAGTGCGCGCGCCATACATCCCTACCAAATCA</b>   |
| <i>tprK</i> -R_bc X-4  | <b>CTGTGTAGAGAGCACACCATACATCCCTACCAAATCA</b>  |
| <i>tprK</i> -R_bc X-5  | <b>TCACGTATCTCGTATAACCATACATCCCTACCAAATCA</b> |
| <i>tprK</i> -R_bc X-6  | <b>TCTCTCACAGTCGAGCCCATACATCCCTACCAAATCA</b>  |
| <i>tprK</i> -R_bc X-7  | <b>TAGCAGATCTCTAGCGCCATACATCCCTACCAAATCA</b>  |
| <i>tprK</i> -R_bc X-8  | <b>ATATAGAGAGCGTACACCATACATCCCTACCAAATCA</b>  |
| <i>tprK</i> -R_bc X-9  | <b>TGTCGACACACGTGCTCCATACATCCCTACCAAATCA</b>  |
| <i>tprK</i> -R_bc X-10 | <b>CACGCTATCAGTGAGACCATACATCCCTACCAAATCA</b>  |
| <i>tprK</i> -R_bc X-11 | <b>CGACACTCTCACGCTACCATACATCCCTACCAAATCA</b>  |
| <i>tprK</i> -R_bc X-12 | <b>GAGAGAGCACACGTGTCCATACATCCCTACCAAATCA</b>  |
| <i>tprK</i> -R_bc X-13 | <b>CGAGAGTGCTCATAGACCATACATCCCTACCAAATCA</b>  |
| <i>tprK</i> -R_bc X-14 | <b>GTGCGCTCTCGTGAGACCATACATCCCTACCAAATCA</b>  |
| <i>tprK</i> -F_bc S-1  | <b>TCATACACACAGATAGACCGGGCATGAATTTTCTTT</b>   |
| <i>tprK</i> -F_bc S-2  | <b>TATAGAGCTCTACATAACCGGGCATGAATTTTCTTT</b>   |
| <i>tprK</i> -F_bc S-3  | <b>GCGCTCTCTCACATACACCGGGCATGAATTTTCTTT</b>   |
| <i>tprK</i> -F_bc S-4  | <b>CACATATCAGAGTGCGACCGGGCATGAATTTTCTTT</b>   |
| <i>tprK</i> -F_bc S-5  | <b>TGACAGTATCACAGTGACCGGGCATGAATTTTCTTT</b>   |
| <i>tprK</i> -F_bc S-6  | <b>TGAGTGAGACATATCAACCGGGCATGAATTTTCTTT</b>   |
| <i>tprK</i> -F_bc S-7  | <b>TATCTGAGCGCGAGCAACCGGGCATGAATTTTCTTT</b>   |
| <i>tprK</i> -F_bc S-8  | <b>TCACGTGCAGATATAGACCGGGCATGAATTTTCTTT</b>   |
| <i>tprK</i> -F_bc S-9  | <b>TCTCATGTGTGAGCTAACCGGGCATGAATTTTCTTT</b>   |
| <i>tprK</i> -F_bc S-10 | <b>GCGTGTGTCGAGTGTAACCGGGCATGAATTTTCTTT</b>   |
| <i>tprK</i> -F_bc S-11 | <b>TCTGTATCTCTATGTGACCGGGCATGAATTTTCTTT</b>   |
| <i>tprK</i> -F_bc S-12 | <b>ACACACTCTATCAGATACCGGGCATGAATTTTCTTT</b>   |
| <i>tprK</i> -F_bc S-13 | <b>CGTATACAGTCACGCTACCGGGCATGAATTTTCTTT</b>   |

|                       |                                                |
|-----------------------|------------------------------------------------|
| <i>tprK-F_bc</i> S-14 | <b>CTGTGCTATGTACGCGACCGGGCATGAATTTTCTTT</b>    |
| <i>tprK-R_bc</i> S-1  | <b>CTATCTGTGTGTATGACCATAACATCCCTACCAAATCA</b>  |
| <i>tprK-R_bc</i> S-2  | <b>TATGTAGAGCTCTATAACCATAACATCCCTACCAAATCA</b> |
| <i>tprK-R_bc</i> S-3  | <b>GTATGTGAGAGAGCGCCCATACATCCCTACCAAATCA</b>   |
| <i>tprK-R_bc</i> S-4  | <b>CGCACTCTGATATGTGCCATAACATCCCTACCAAATCA</b>  |
| <i>tprK-R_bc</i> S-5  | <b>CACTGTGATACTGTCACCATAACATCCCTACCAAATCA</b>  |
| <i>tprK-R_bc</i> S-6  | <b>TGATATGTCTCACTCACCATAACATCCCTACCAAATCA</b>  |
| <i>tprK-R_bc</i> S-7  | <b>TGCTCGCGCTCAGATAACCATAACATCCCTACCAAATCA</b> |
| <i>tprK-R_bc</i> S-8  | <b>CTATATCTGCACGTGACCATAACATCCCTACCAAATCA</b>  |
| <i>tprK-R_bc</i> S-9  | <b>TAGCTCACACATGAGACCATAACATCCCTACCAAATCA</b>  |
| <i>tprK-R_bc</i> S-10 | <b>TACACTCGACACACGCCCATACATCCCTACCAAATCA</b>   |
| <i>tprK-R_bc</i> S-11 | <b>CACATAGAGATACAGACCATAACATCCCTACCAAATCA</b>  |
| <i>tprK-R_bc</i> S-12 | <b>ATCTGATAGAGTGTGTCCATAACATCCCTACCAAATCA</b>  |
| <i>tprK-R_bc</i> S-13 | <b>AGCGTGA CTGTATACGCCATAACATCCCTACCAAATCA</b> |
| <i>tprK-R_bc</i> S-14 | <b>CGCGTACATAGCACAGCCATAACATCCCTACCAAATCA</b>  |

---

Table S2. The long-read sequencing data of the *tprK* gene in the 28 clinical syphilis samples

| Sample | Raw reads | Clean reads | Base (nt) | Avg Len (nt) | Effective % |
|--------|-----------|-------------|-----------|--------------|-------------|
| X-1    | 4546      | 4474        | 7126848   | 1592         | 98.42       |
| X-2    | 7152      | 7020        | 11178264  | 1592         | 98.15       |
| X-3    | 5551      | 5497        | 8754668   | 1592         | 99.03       |
| X-4    | 4959      | 4896        | 7794719   | 1592         | 98.73       |
| X-5    | 7268      | 7129        | 11354200  | 1592         | 98.09       |
| X-6    | 6889      | 6684        | 10606398  | 1586         | 97.02       |
| X-7    | 8076      | 7350        | 11525568  | 1568         | 91.01       |
| X-8    | 1154      | 1086        | 1724578   | 1588         | 94.11       |
| X-9    | 3165      | 3095        | 4926502   | 1591         | 97.79       |
| X-10   | 5784      | 5677        | 9031877   | 1590         | 98.15       |
| X-11   | 6392      | 6138        | 9729706   | 1585         | 96.03       |
| X-12   | 5523      | 5414        | 8627022   | 1593         | 98.03       |
| X-13   | 1471      | 1394        | 2215111   | 1589         | 94.77       |
| X-14   | 1377      | 1321        | 2098654   | 1588         | 95.93       |
| S-1    | 2163      | 2088        | 3323146   | 1591         | 96.53       |
| S-2    | 6355      | 6296        | 10018307  | 1591         | 99.07       |
| S-3    | 8002      | 7602        | 12099001  | 1591         | 95          |
| S-4    | 7709      | 7560        | 11916631  | 1576         | 98.07       |
| S-5    | 5385      | 5266        | 8362915   | 1588         | 97.79       |
| S-6    | 6962      | 6615        | 10530164  | 1591         | 95.02       |
| S-7    | 2935      | 2819        | 4485336   | 1591         | 96.05       |
| S-8    | 2436      | 2324        | 3697159   | 1590         | 95.4        |
| S-9    | 6327      | 6267        | 9953501   | 1588         | 99.05       |
| S-10   | 4805      | 4678        | 7440165   | 1590         | 97.36       |
| S-11   | 6200      | 5766        | 9186670   | 1593         | 93          |
| S-12   | 6480      | 6418        | 10112690  | 1575         | 99.04       |
| S-13   | 3389      | 3317        | 5267864   | 1588         | 97.88       |
| S-14   | 5472      | 5420        | 8535148   | 1574         | 99.05       |
